# Supplementary material
Source: PubMed Central journal article supplement (PMC10307850)
Supplement: 41418_2023_1183_MOESM1_ESM.pdf [file 41418_2023_1183_MOESM1_ESM.pdf]

1 **Supplemental material**

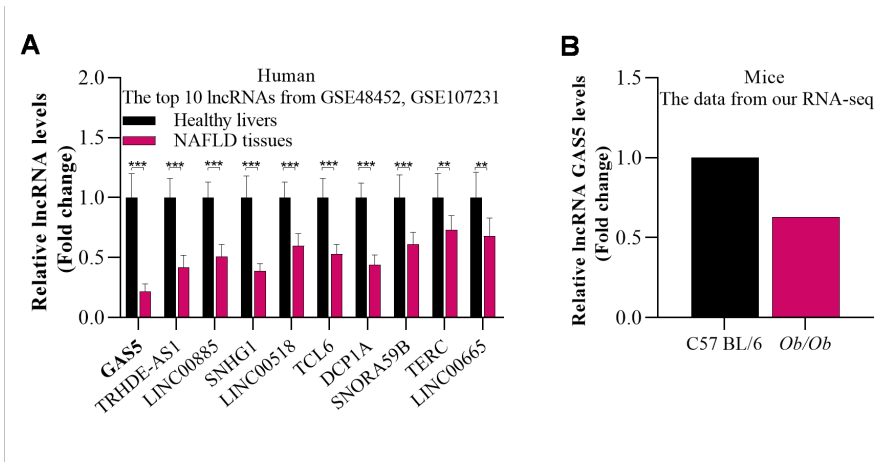

2

3 **Fig. S1. GAS5 was the lncRNA with significantly changed expression identified by RNA-seq analysis**  
4 **of liver samples. (A)** We first downloaded 2 human NAFLD-related microarray datasets, GSE48452  
5 (containing 14 healthy control and 32 NAFLD tissue samples) and GSE107231 (containing 5 normal liver  
6 and 5 NAFLD biopsy tissue samples), from Gene Expression Omnibus (GEO) and analysed the  
7 downregulated lncRNAs in both datasets. Here, we reconfirmed the top 10 decreased lncRNAs by RT-qPCR  
8 in our collected clinical specimens. **(B)** GAS5 expression was also decreased in the livers of NAFLD mice  
9 as determined by lncRNA-seq analysis in our own database. The data are presented as the mean  $\pm$  S.D. of  
10 three independent experiments. A  $p$  value of  $< 0.05$  was considered statistically significant; and  $*p < 0.05$ ,  
11  $**p < 0.01$ ,  $***p < 0.001$  assessed via a two-tailed  $t$  test for examining the significance of differences between  
12 two groups; ns: not significant.

13

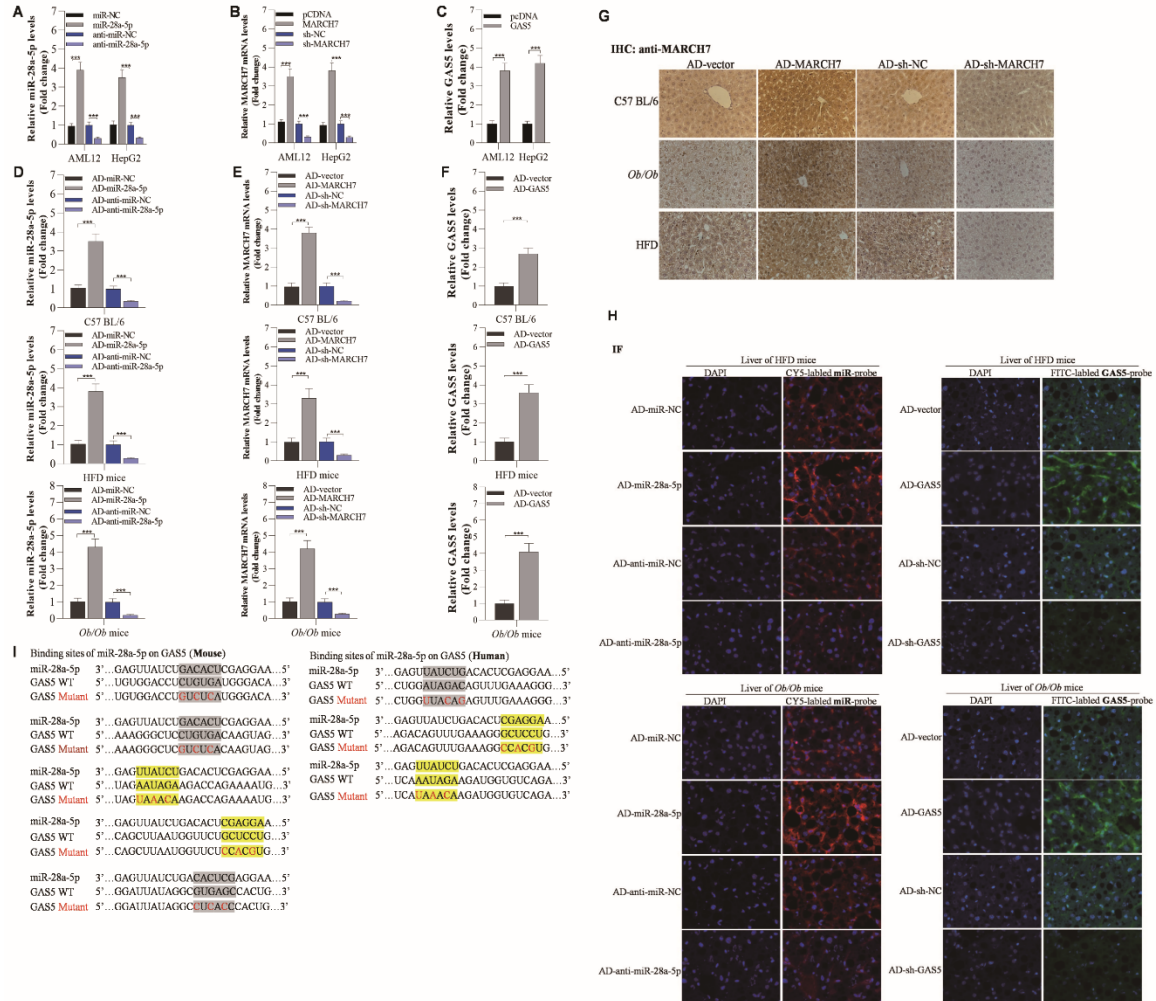

14  
 15 **Fig. S2. The expression of siRNAs, plasmids, and adenoviruses for knockdown or overexpression of**  
 16 **GAS5, miR-28a-5p, and MARCH7 in AML12 cells, HepG2 cells and mouse livers.** In this study, AML12  
 17 and HepG2 cells were transfected with miRNAs, plasmids, or lncRNAs for 12 h. In addition, mice were  
 18 injected every 10 days with adenoviruses to decrease or increase the hepatic expression of GAS5, miR-28a-  
 19 5p, and MARCH7. After 3 weeks of injection, the mice were prepared for further analysis. Herein, the  
 20 expression of GAS5, miR-28a-5p, and MARCH7 *in vitro* and *in vivo* was measured using RT-qPCR analysis.  
 21 (A) The expression of miR-28a-5p in AML12 and HepG2 cells. (B) The expression of MARCH7 in AML12  
 22 and HepG2 cells. (C) GAS5 expression in AML12 and HepG2 cells. (D) The expression of miR-28a-5p in  
 23 the livers of C57BL/6 mice, HFD-fed mice, and *Ob/Ob* mice after 3 weeks of the first injection. (E) The  
 24 expression of MARCH7 in the livers of C57BL/6 mice, HFD-fed mice, and *Ob/Ob* mice. (F) The expression  
 25 of GAS5 in the livers of C57BL/6 mice, HFD-fed mice, and *Ob/Ob* mice. (G) IHC staining of MARCH7  
 26 levels in liver of mice after 3 weeks of injection. (H) Immunofluorescence detecting of GAS5 and miR-28a-  
 27 5p in liver of mice after 3 weeks of injection. (I) Additionally, the binding sites between GAS5 and miR-28a-  
 28 5p were predicted by sequence alignment, and there were two conserved binding sites between GAS5 and  
 29 miR-28a-5p (yellow background). The data are presented as the mean  $\pm$  S.D. of three independent

30 experiments. Two-tailed Student's *t* test was used to determine the significance of differences between two  
 31 groups (A-F). A *p* value of < 0.05 was considered statistically significant; and \**p* < 0.05, \*\**p* < 0.01, \*\*\**p* <  
 32 0.001; <sup>ns</sup>*p* > 0.05, ns: not significant.

33

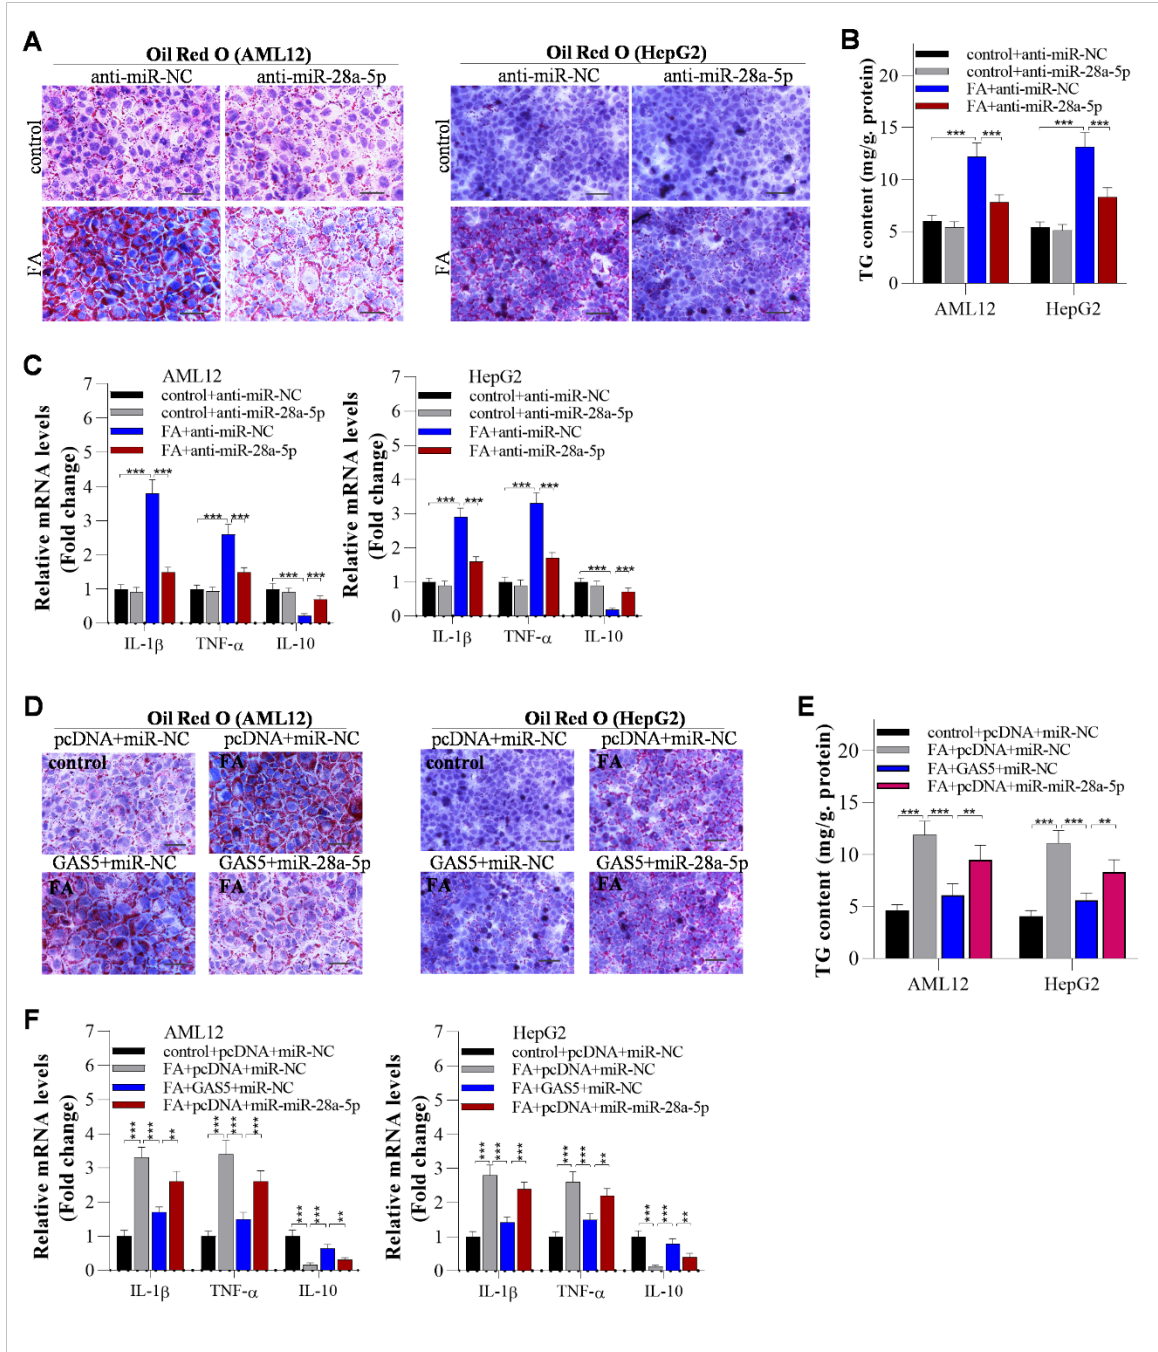

34

35 **Fig. S3. miR-28a-5p knockdown inhibits lipid deposition and inflammation in AML12 and HepG2 cells**  
 36 **(A-C). Overexpression of miR-28a-5p significantly blocks GAS5 overexpression-induced inhibition of**  
 37 **lipid accumulation in AML12 and HepG2 cells (D-F).**

38 On the one hand (A-C), AML12 and HepG2 cells were incubated with FAs for 12 h after 12 h of transfection  
 39 with the indicated anti-miR-NC and anti-miR-28a-5p constructs. (A) Oil Red O staining; Scale bar, 50  $\mu$ M.  
 40 (B) ELISA of TG content. (C) RT-qPCR analysis of inflammation-related genes. On the other hand (D-F),  
 41 we found that overexpression of miR-28a-5p blocks GAS5-controlled lipid deposition and inflammation in  
 42 AML12 and HepG2 cells. (D) Oil Red O staining; Scale bar, 50  $\mu$ M. (E) ELISA of TG content. (F) RT-  
 43 qPCR analysis of inflammation-related genes. All indicated data are shown as the means  $\pm$  S.D.s. A *p* value  
 44 of  $< 0.05$  was considered statistically significant; and \**p* $<0.05$ , \*\**p* $<0.01$ , \*\*\**p* $<0.001$  assessed via a ANOVA  
 45 with the Bonferroni post hoc test for comparisons among more than two groups (B, C, E, F); ns: not  
 46 significant.

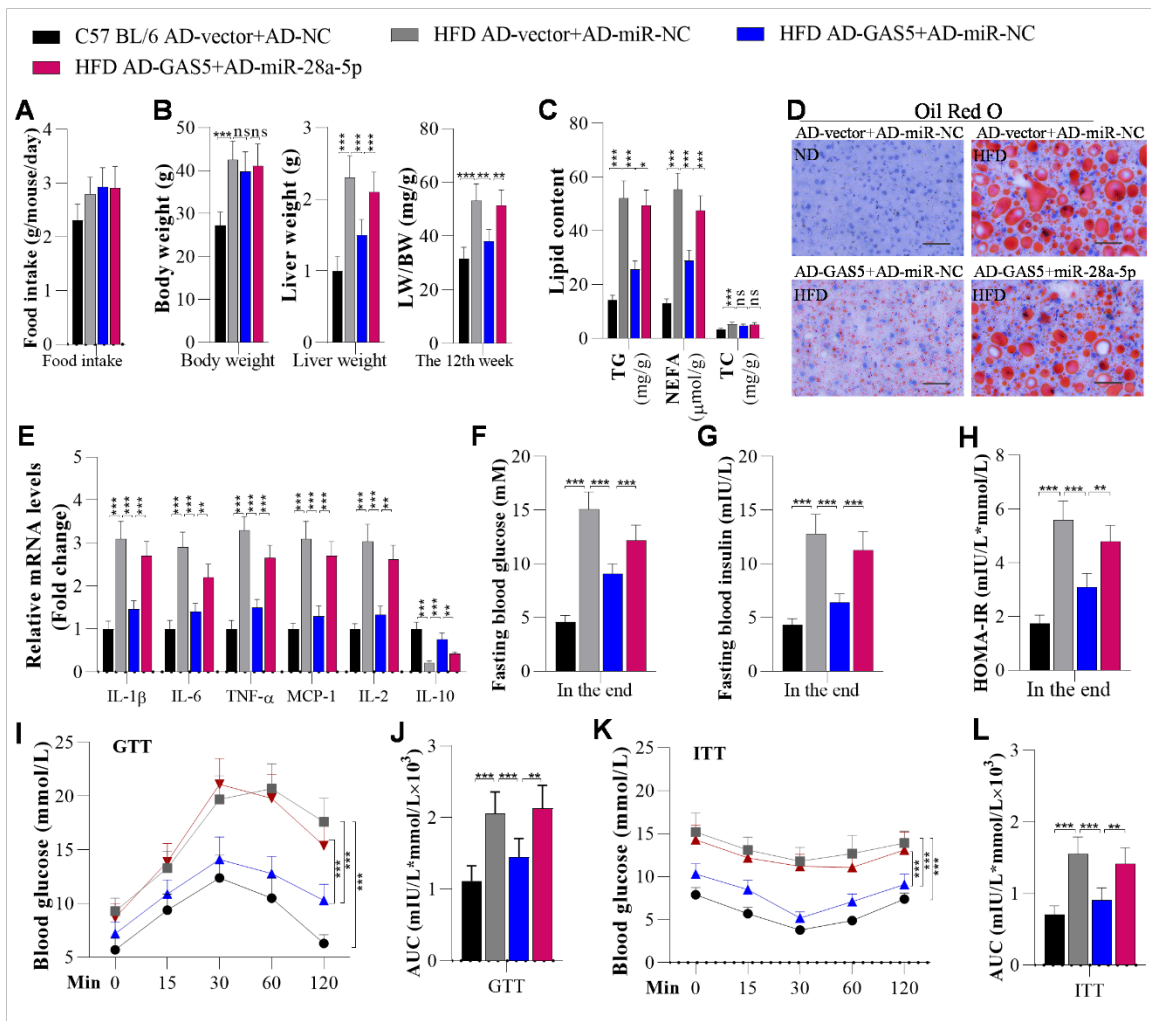

48  
 49 **Fig. S4. Overexpression of miR-28a-5p significantly reduces GAS5 overexpression-mediated**  
 50 **suppression of hepatic steatosis, inflammation, and insulin resistance in HFD-fed mice.**  
 51 Mice were fed a ND or HFD for 12 weeks. Then, they were injected with adenoviruses every 10 days, and  
 52 these mice were continuously fed a ND or HFD. After 3 weeks of the first injection, the mice were used for  
 53 further analysis. (A) Food intake was measured every day during ND or HFD feeding (n=5/group). (B) The

54 body weight, liver weight, and LW/BW ratios of C57BL/6 and HFD-fed mice after 3 weeks of injection of  
55 adenoviruses (n=5/group). (C) TG, NEFA, and TC levels were measured using ELISA in the livers of  
56 C57BL/6 and HFD-fed mice (n=5/group). (D) Oil Red O staining of liver sections from adenovirus-injected  
57 C57BL/6 and HFD-fed mice (n=5/group); Scale bar, 50  $\mu$ M. (E) The mRNA levels of inflammation-related  
58 genes analysed by RT-qPCR (n=5/group). (F) Fasting blood glucose levels of C57BL/6 and HFD-fed mice  
59 (n=5/group). (G, H) Fasting insulin levels and HOMA-IR scores of adenovirus-injected C57BL/6 and HFD-  
60 fed mice (n=5/group). (I-L) GTT and ITT of C57BL/6 and HFD-fed mice after 3 weeks of the first adenovirus  
61 injection and the areas under the curve (AUCs) for the GTT and ITT (N=5/group). The data are presented as  
62 the mean  $\pm$  S.D. of three independent experiments. A *p* value of  $< 0.05$  was considered statistically significant;  
63 and \**p* $<0.05$ , \*\**p* $<0.01$ , \*\*\**p* $<0.001$  assessed via a ANOVA with the Bonferroni post hoc test for comparisons  
64 among more than two groups (A-L); ns: not significant.  
65

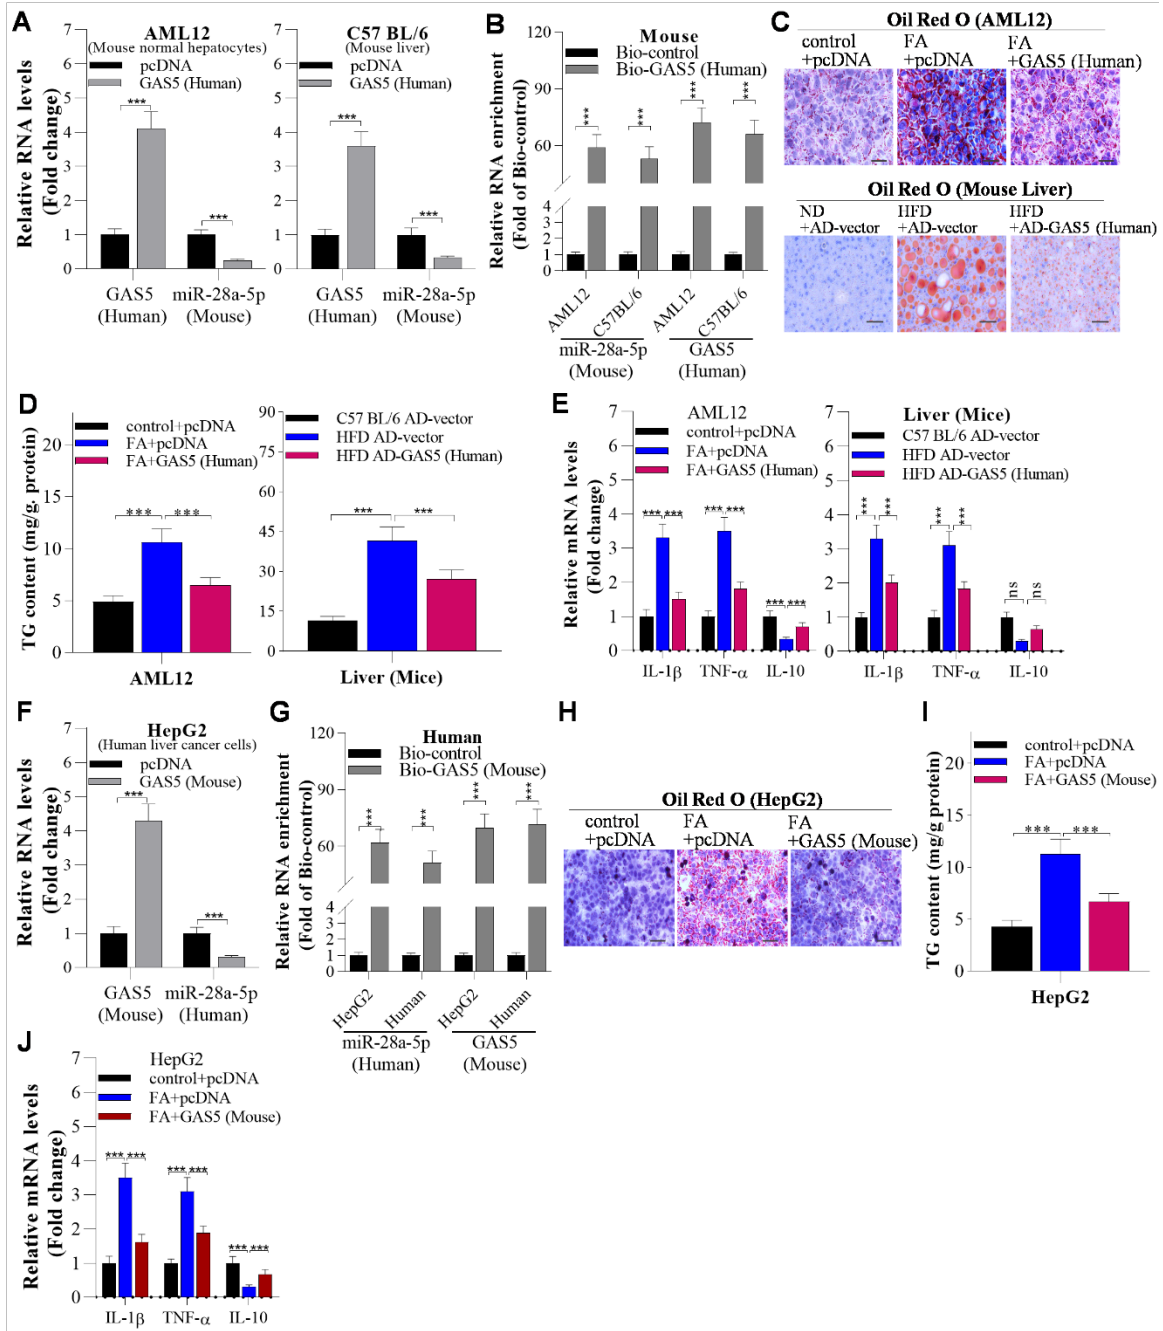

66  
 67 **Fig. S5. Heterologous overexpression of GAS5 significantly suppresses lipid deposition and**  
 68 **inflammation in AML12 and HepG2 cells.** Because there are two conserved binding sites between  
 69 GAS5/miR-28a-5p between humans and mice, we hypothesized that the functions of the GAS5/miR-28a-5p  
 70 axis were also conserved in the liver between these two species. (A) After overexpression of human GAS5  
 71 in AML12 normal mouse hepatocytes for 12 h and in the livers of mice for one week, we examined the miR-  
 72 28a-5p levels. (B) the Biotinylated GAS5 pull-down assay showed that human GAS5 interacted with mouse  
 73 miR-28a-5p in AML12 cells and mouse liver tissues. (C, D, E) After overexpression of human GAS5 in  
 74 AML12 cells treated with FAs for 24 h and the livers of C57BL/6 mice, we examined the lipid content and

75 inflammation; Scale bar, 50  $\mu$ M. **(F)** After overexpression of mouse GAS5 in HepG2 human liver cancer  
76 cells for 12 hours, we determined the miR-28a-5p levels. **(G)** After overexpression of mouse GAS5 in human  
77 liver cancer HepG2 cells, we confirmed that mouse GAS5 bound to human miR-28a-5p in HepG2 cells. **(H,**  
78 **I, J)** After overexpression of mouse GAS5 inhibited lipid accumulation and inflammation in HepG2 cells,  
79 we evaluated the lipid content and inflammation; Scale bar, 50  $\mu$ M. The data are presented as the mean  $\pm$   
80 S.D. of three independent experiments. A  $p$  value of  $< 0.05$  was considered statistically significant; and  
81  $*p<0.05$ ,  $**p<0.01$ ,  $***p<0.001$  assessed via a two-tailed  $t$  test for examining the significance of differences  
82 between two groups (A, B, F, G) or ANOVA with the Bonferroni post hoc test for comparisons among more  
83 than two groups (D, E, I, J); ns: not significant.

84

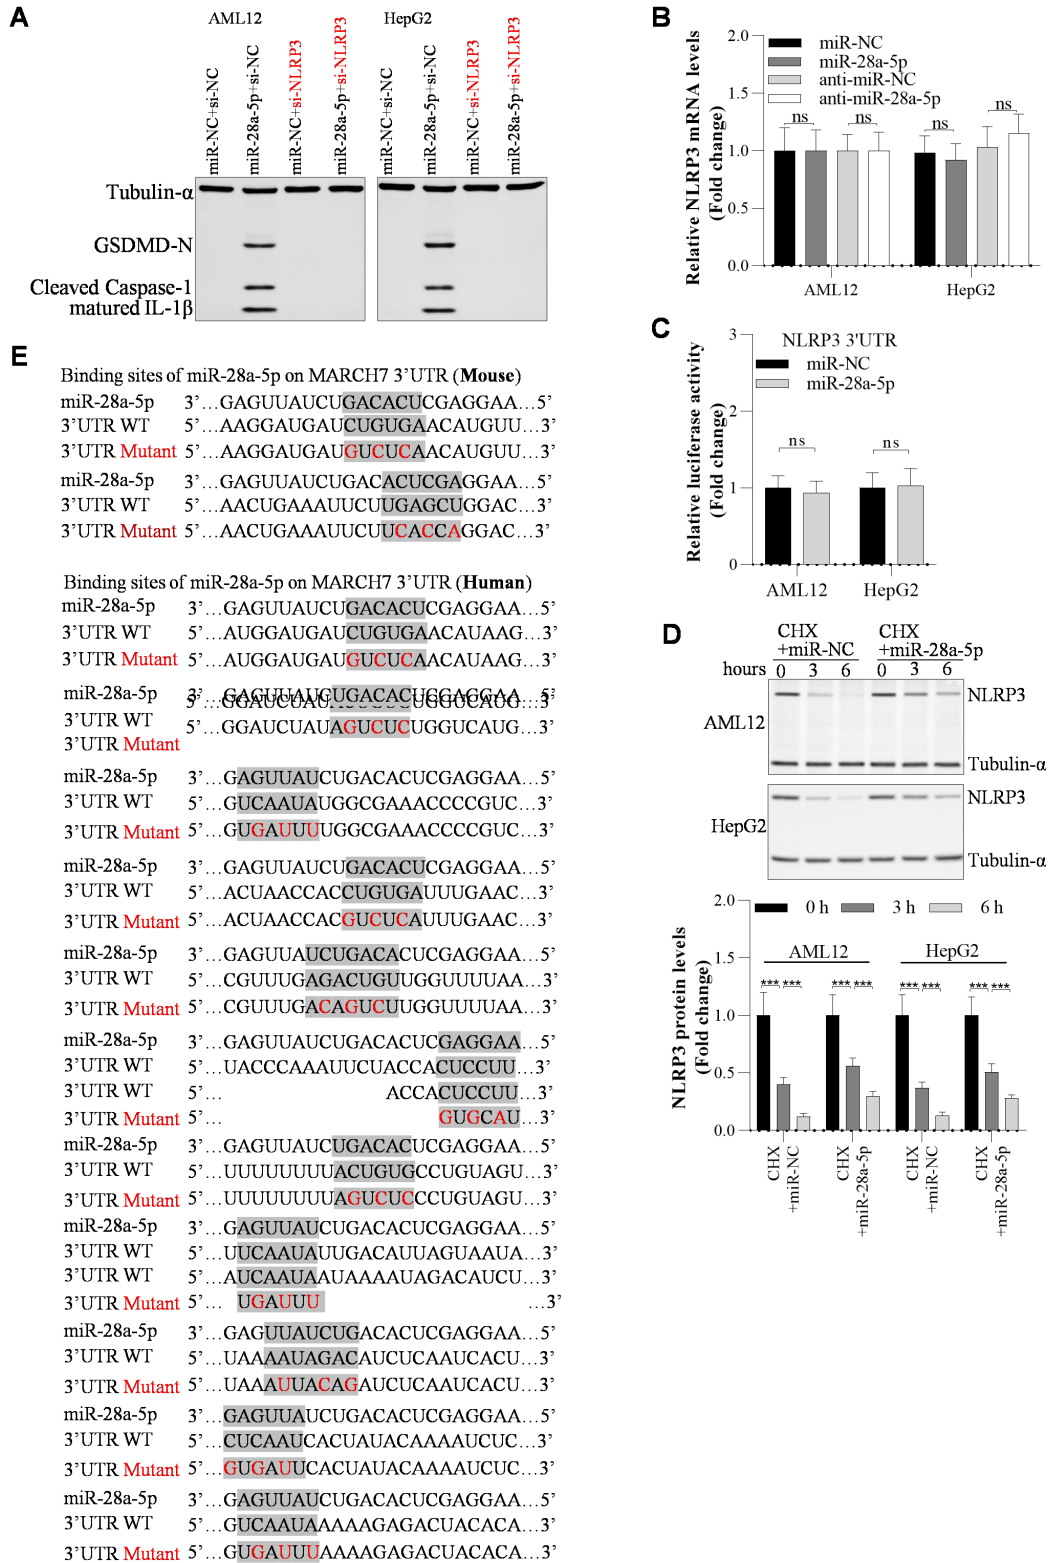

85

86 **Fig. S6. Interfering with NLRP3 expression blocks miR-28a-5p-mediated activation of pyroptosis. (A)**

87 Interfering with NLRP3 expression blocks miR-28a-5p-mediated activation of pyroptosis, as evidenced by

88 Western blot analysis of pyroptosis-associated proteins after 24 h of FA treatment in anti-miR-NC-, si-NC,



89 anti-miR-28a-5p, or si-NLRP3-transfected AML12 and HepG2 cells. **(B)** The hepatocytes were transfected  
90 with miR-NC, miR-28a-5p, anti-miR-NC, anti-miR-28a-5p for 24 h, and they were collected to determine  
91 NLRP3 mRNA expressions evidenced by RT-qPCR. **(C)** The hepatocytes were transfected with miR-NC,  
92 miR-28a-5p, and co-transfected with NLRP3 3'UTR for 24 h. Then, they were prepared for luciferase  
93 reporter assay. **(D)** miR-28a-5p significantly inhibited CHX-induced degradation of NLRP3 protein. They  
94 were incubated with 30  $\mu$ M CHX along with miR-NC or miR-28a-5p transfection for 0 h, 3 h, 6 h. **(E)** The  
95 potential binding sites of miR-28a-5p in the MARCH7 3'UTR (mouse or human) were examined by sequence  
96 alignment. The data are presented as the mean  $\pm$  S.D. of three independent experiments. A *p* value of < 0.05  
97 was considered statistically significant; and \**p*<0.05, \*\**p*<0.01, \*\*\**p*<0.001 assessed via a two-tailed *t* test for  
98 examining the significance of differences between two groups (B, C) or ANOVA with the Bonferroni post  
99 hoc test for comparisons among more than two groups (D); ns: not significant.

100

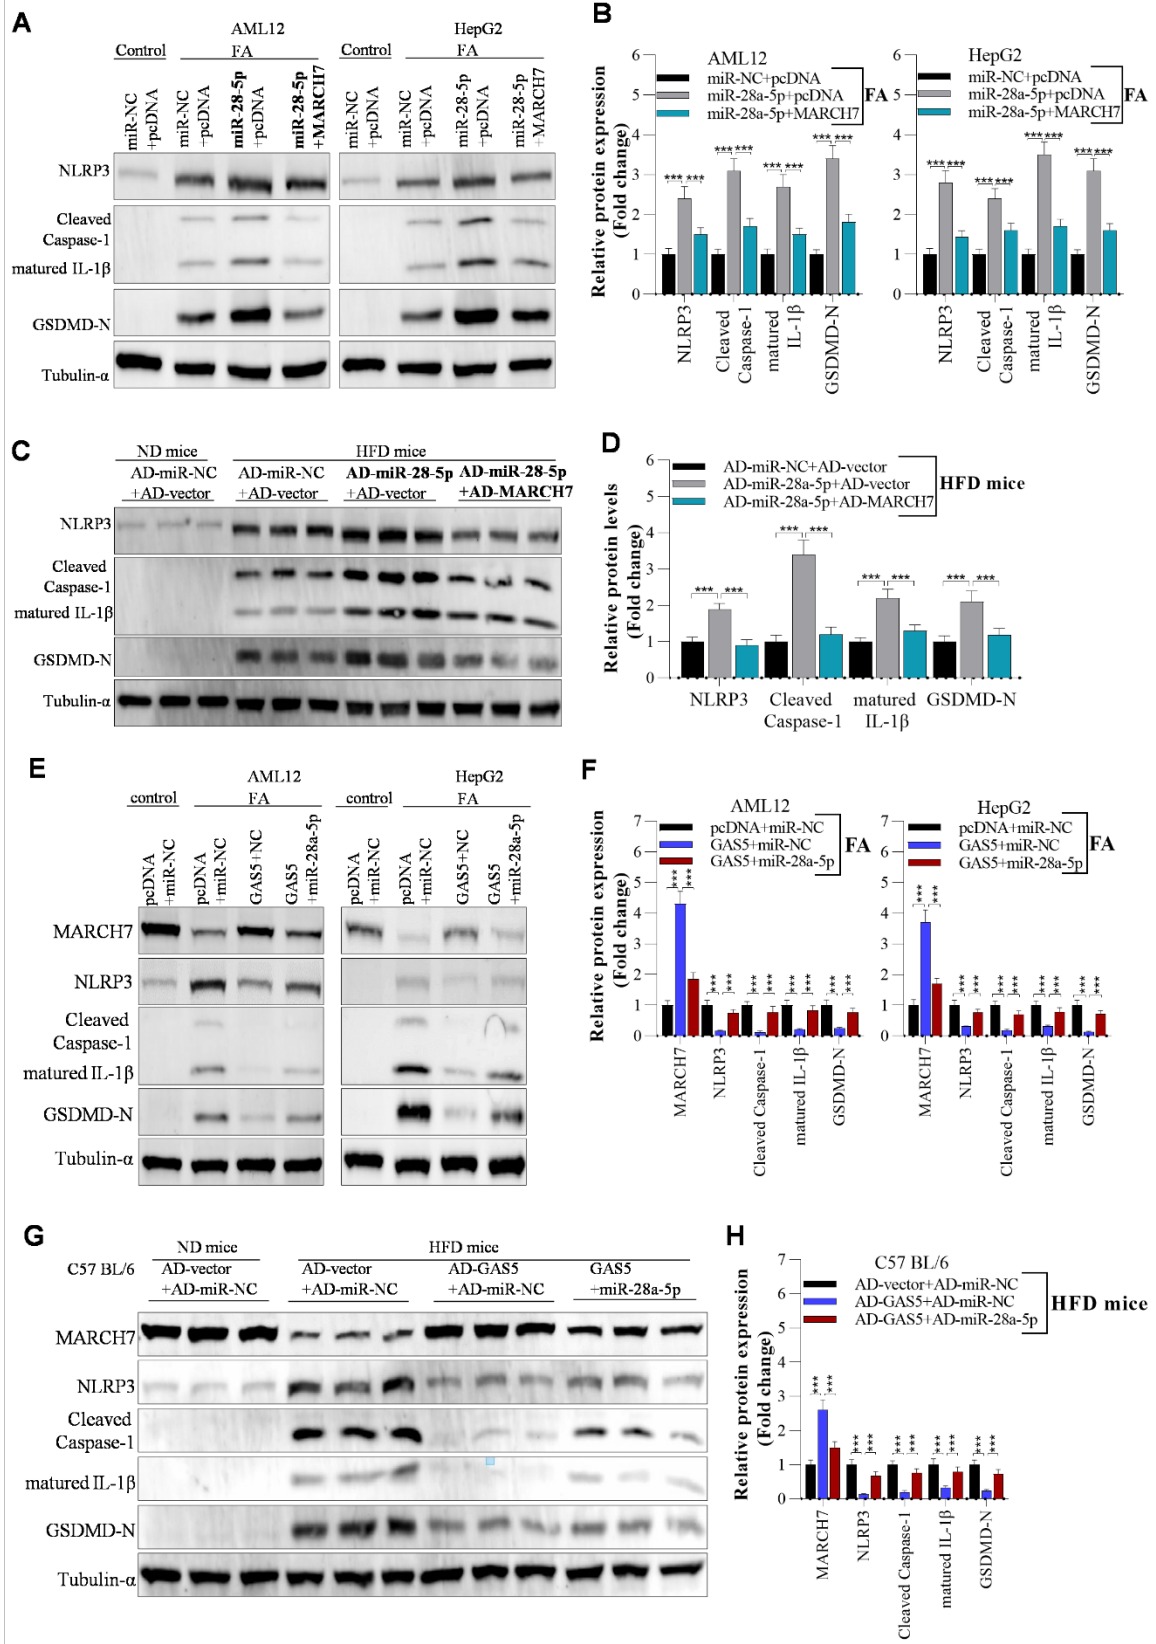

101

102

**Fig. S7. MARCH7 overexpression reversed the miR-28a-5p overexpression-induced enhancement of**

103 **pyroptosis.** First, AML12 and HepG2 cells were transfected with overexpression plasmids for 12 h. Then,  
104 the cells were incubated with FAs for 12 h. The cells were collected for further analysis. **(A, B)** Western blot  
105 analysis of the expression of pyroptosis-related molecules in AML12 and HepG2 cells after 24 h of  
106 transfection with miR-NC, pcDNA, miR-28a-5p, or pcDNA-MARCH7. **(C, D)** Western blot analysis of the  
107 expression of pyroptosis-related molecules in the livers of C57BL/6 mice after adenovirus injection for 7  
108 days. All the data are shown as the means  $\pm$  S.D.s. The data are presented as the mean  $\pm$  S.D. of three  
109 independent experiments. **(E, F)** Western blot analysis of pyroptosis-related gene expression in AML12 and  
110 HepG2 cells after 24 h transfection with pcDNA, miR-NC, GAS5, and another 12 h of FA treatment. **(G, H)**  
111 Western blot analysis of pyroptosis-related gene expression in the livers of HFD-fed mice after 7 days of  
112 injection with adenoviruses. The data are presented as the mean  $\pm$  S.D. of three independent experiments. A  
113 *p* value of  $< 0.05$  was considered statistically significant; and \**p* $<0.05$ , \*\**p* $<0.01$ , \*\*\**p* $<0.001$  assessed via a  
114 ANOVA with the Bonferroni post hoc test for comparisons among more than two groups (B, D, F, H); ns:  
115 not significant.  
116

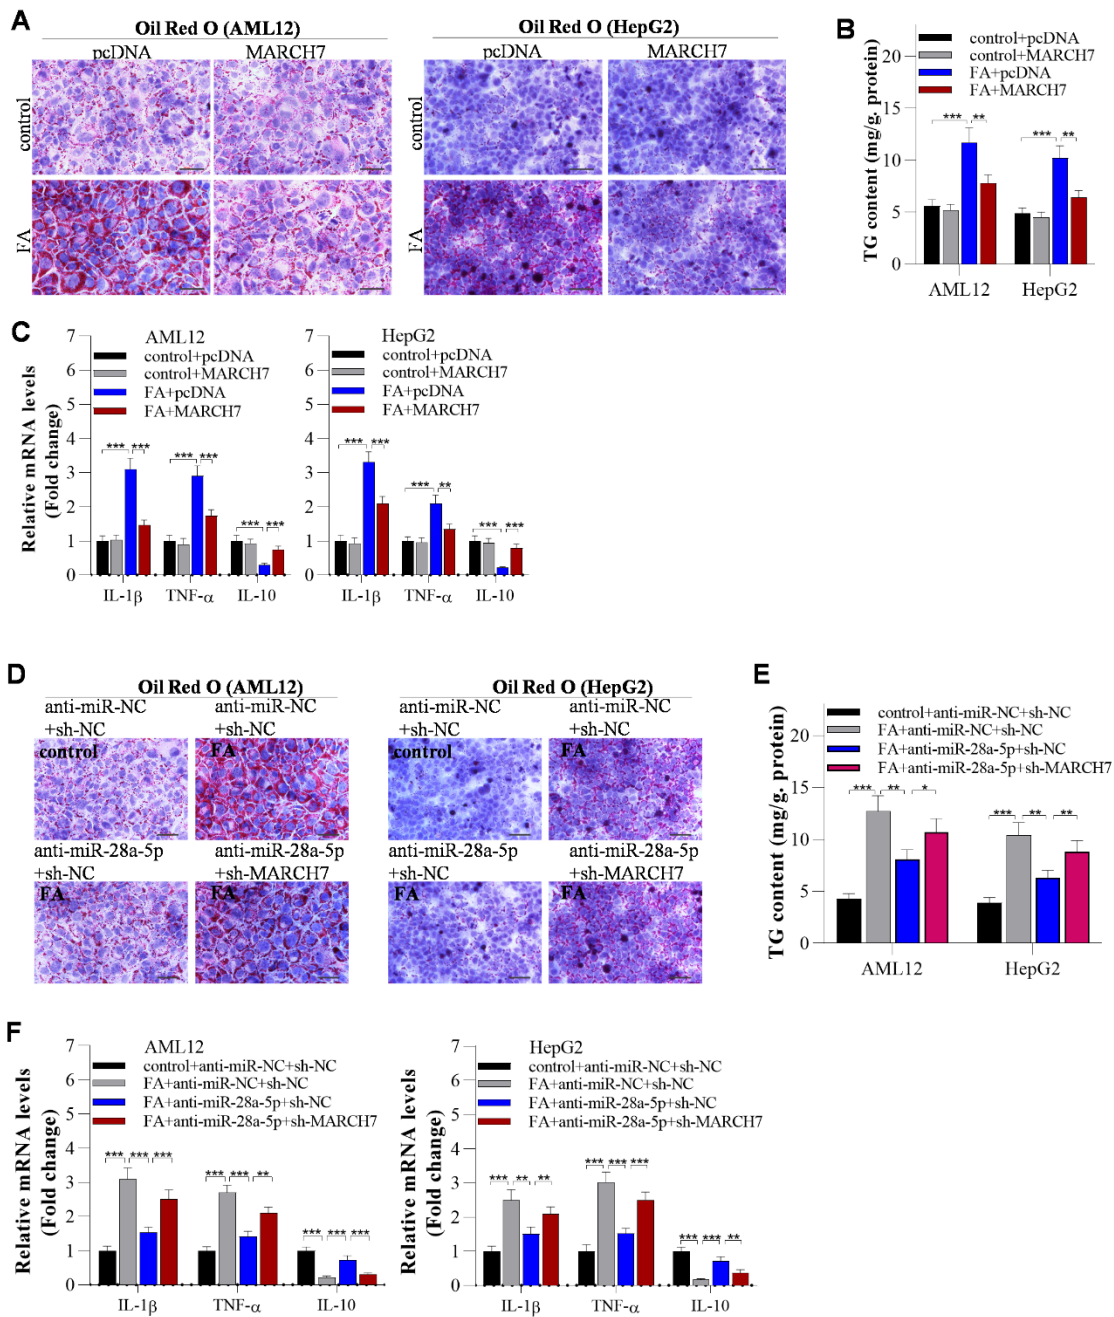

117

118

119

120

121

122

123

124

125

**Fig. S8. Overexpression of MARCH7 attenuates lipid deposition in hepatocytes.** AML12 and HepG2 cells were transfected with the indicated plasmids and miRNAs for 12 h and incubated with FAs for another 12 h. First, (A, D) Oil Red O staining of lipid droplets in hepatocytes; Scale bar, 50  $\mu$ m. (B, E) ELISA of TG content in AML12 and HepG2 cells. (C, F) RT-qPCR assay of inflammation-related gene expression. Afterwards, we found that MARCH7 overexpression significantly inhibited FA-induced hepatic lipid accumulation and that interfering with MARCH7 expression reversed the miR-28a-5p-mediated suppression of pyroptosis in AML12 and HepG2 cells. The data are presented as the mean  $\pm$  S.D. of three independent experiments. A  $p$  value of  $< 0.05$  was considered statistically significant; and \* $p < 0.05$ , \*\* $p < 0.01$ , \*\*\* $p < 0.001$

126 assessed via a ANOVA with the Bonferroni post hoc test for comparisons among more than two groups (B,  
 127 C, E, F); ns: not significant.  
 128

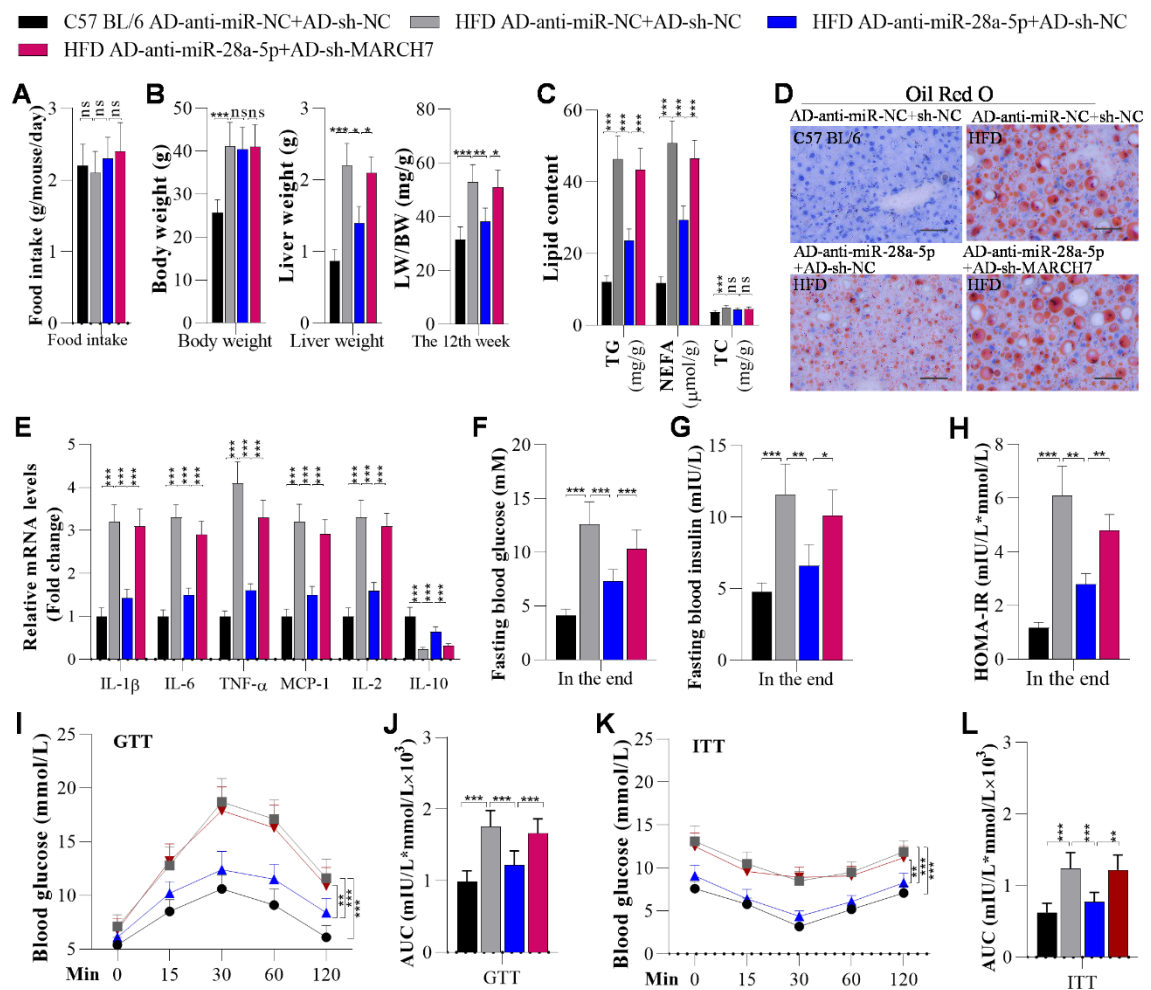

129  
 130 **Fig. S9. Knockdown of MARCH7 reverses anti-miR-28a-5p-mediated suppression of hepatic steatosis,**  
 131 **inflammation, and insulin resistance in HFD-fed mice.** Mice were fed a ND or HFD for 12 weeks. Then,  
 132 they were injected *once a week* with the adenoviruses AD-anti-miR-28a-5p, AD-sh-NC, AD-anti-miR-28a-  
 133 5p, and AD-anti-sh-MARCH7, *and* these mice were continuously fed a ND or HFD. After 3 weeks of the  
 134 first injection, the mice were used for further experiments. (A) The food intake of ND- and HFD-mice  
 135 (n=5/group). (B) The body weights, liver weights, and LW/BW ratios of C57BL/6 and HFD-fed mice  
 136 (n=5/group). (C) TG, NEFA, and TC levels were measured using ELISA in the livers of C57BL/6 and HFD-  
 137 fed mice (n=5/group). (D) Oil Red O staining of mouse liver sections (n=5/group); Scale bar, 50  $\mu$ M. (E)  
 138 The mRNA levels of inflammation-related genes were measured by RT-qPCR (n=5/group). (F) Fasting blood  
 139 glucose levels of C57BL/6 and HFD-fed mice (n=5/group). (G, H) Fasting insulin levels and HOMA-IR  
 140 scores of adenovirus-injected C57BL/6 and HFD-fed mice (n=5/group). (I-L) GTT and ITT of C57BL/6 and  
 141 HFD-fed mice after 3 weeks of the first adenovirus injection and the areas under the curve (AUCs) for the

142 GTT and ITT (N=5/group). The data are presented as the mean  $\pm$  S.D. of three independent experiments. A  
143  $p$  value of  $< 0.05$  was considered statistically significant; and \* $p < 0.05$ , \*\* $p < 0.01$ , \*\*\* $p < 0.001$  assessed via a  
144 ANOVA with the Bonferroni post hoc test for comparisons among more than two groups (A-L); ns: not  
145 significant.  
146

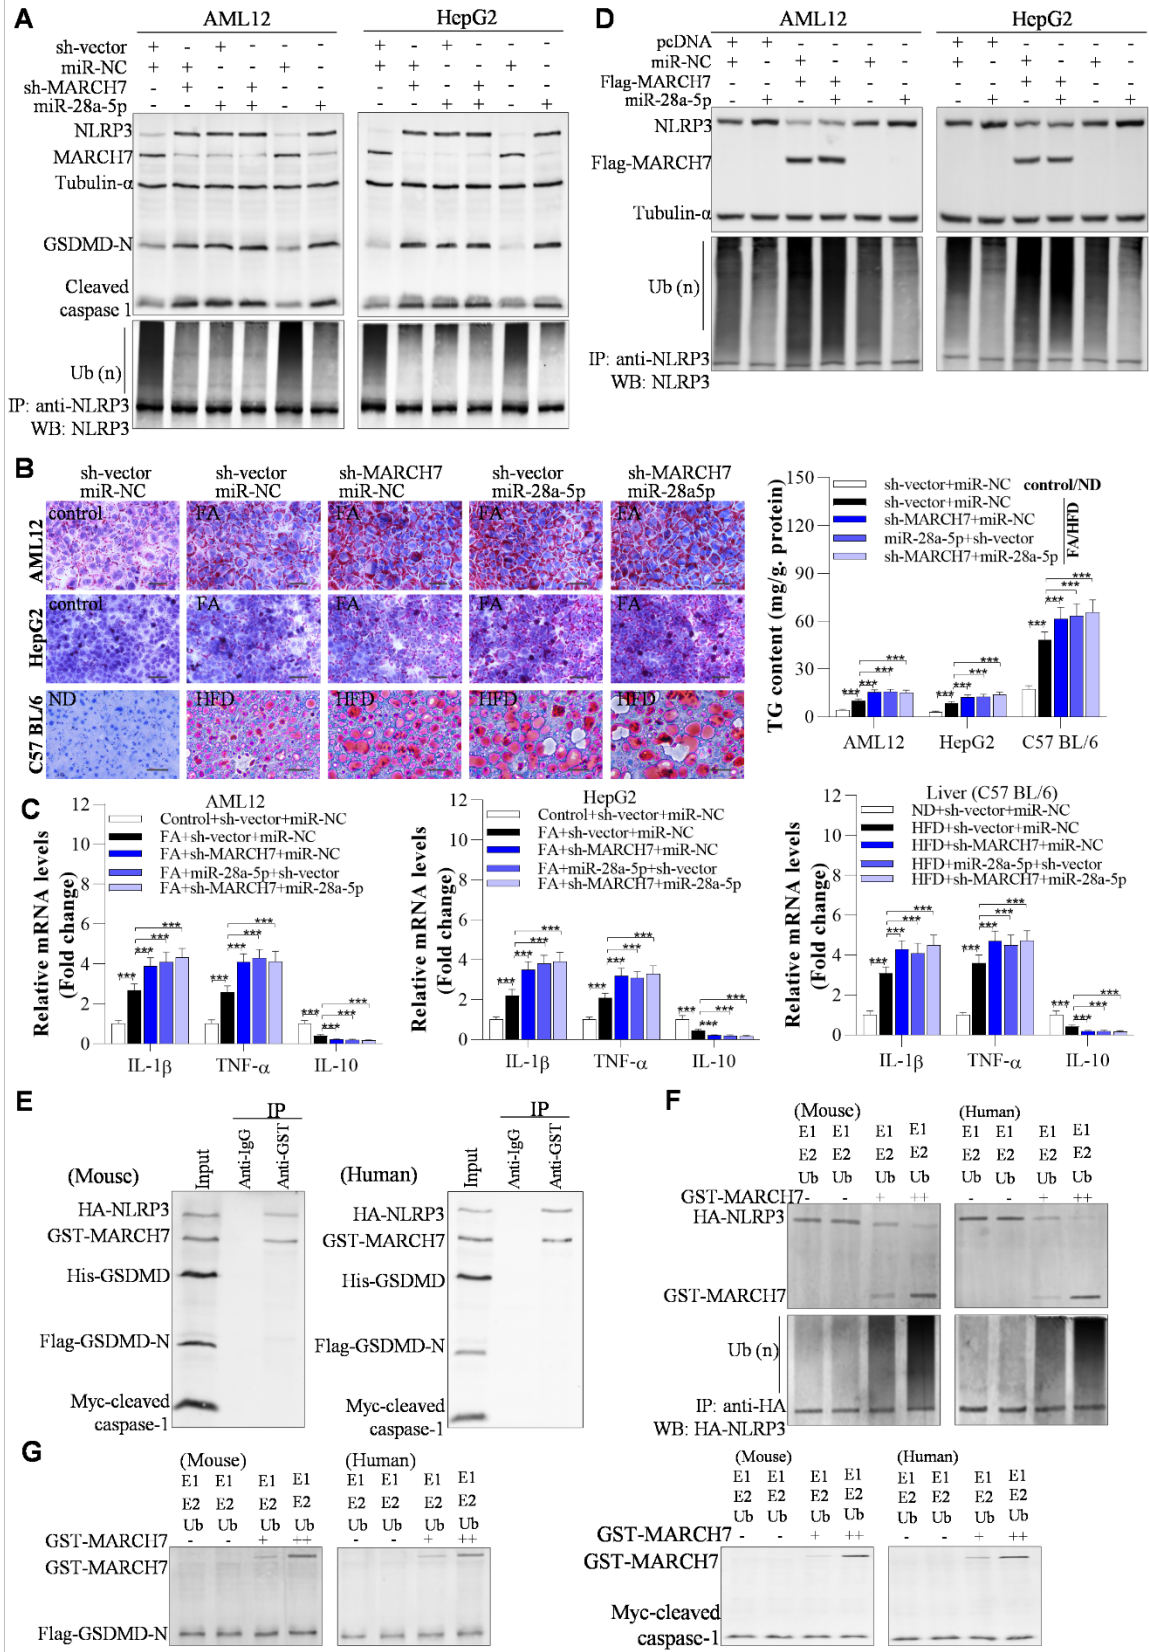

147

148

Fig. S10. MARCH7 was required for miR-28a-5p-induced inhibition of NLRP3 ubiquitination-

149 **mediated degradation to promote pyroptosis.** (A) After MARCH7 knockdown for 48 h, we overexpressed  
150 miR-28a-5p in AML12 and HepG2 cells for another 48 h. Then, we harvested them for Western blot analysis  
151 of pyroptosis and for analysis of NLRP3 ubiquitination after 12 h of incubation with 20  $\mu$ M MG132. (B, C)  
152 After MARCH7 knockdown for 48 h, we overexpressed miR-28a-5p in AML12 and HepG2 cells for another  
153 48 h, and they were incubated with FAs for 8 h; Scale bar, 50  $\mu$ M. In addition, mice were fed a ND or HFD  
154 for 8 weeks. Then, they were injected with adenoviruses *every 10 days*, and these mice were continuously  
155 fed a ND or HFD. After the first injection for 3 weeks, the mice were used for Oil Red O staining, TG  
156 measurement, and RT-qPCR. (D) After MARCH7 overexpression for 48 h, we overexpressed miR-28a-5p  
157 in AML12 and HepG2 cells for another 48 h, and we collected them for analysis of NLRP3 ubiquitination  
158 after 12 h of incubation with 20  $\mu$ M MG132. (E) The purified proteins were prepared by Sangon (Shanghai)  
159 and mixed together in cell lysis buffer, and the MARCH7-bound proteins were identified using a GST pull-  
160 down assay. (F, G) The purified proteins were mixed together in cell lysis buffer following the instructions  
161 of an *in vitro* ubiquitination assay kit (VIVA Bioscience, Amyjet Scientific Inc, Wuhan, China) and an *in vitro*  
162 ubiquitination assay protocol (DOI: 10.21769/BioProtoc.928); the effects of GST-MARCH7 on the levels of  
163 HA-NLRP3, Flag-GSDMD-N, and Myc-caspase-1 were examined by western blotting; and the  
164 ubiquitination of HA-NLRP3 was analysed. The data are presented as the mean  $\pm$  S.D. of three independent  
165 experiments. A *p* value of  $< 0.05$  was considered statistically significant; and \**p* $<0.05$ , \*\**p* $<0.01$ , \*\*\**p* $<0.001$   
166 assessed via a ANOVA with the Bonferroni post hoc test for comparisons among more than two groups (B,  
167 C); ns: not significant.  
168



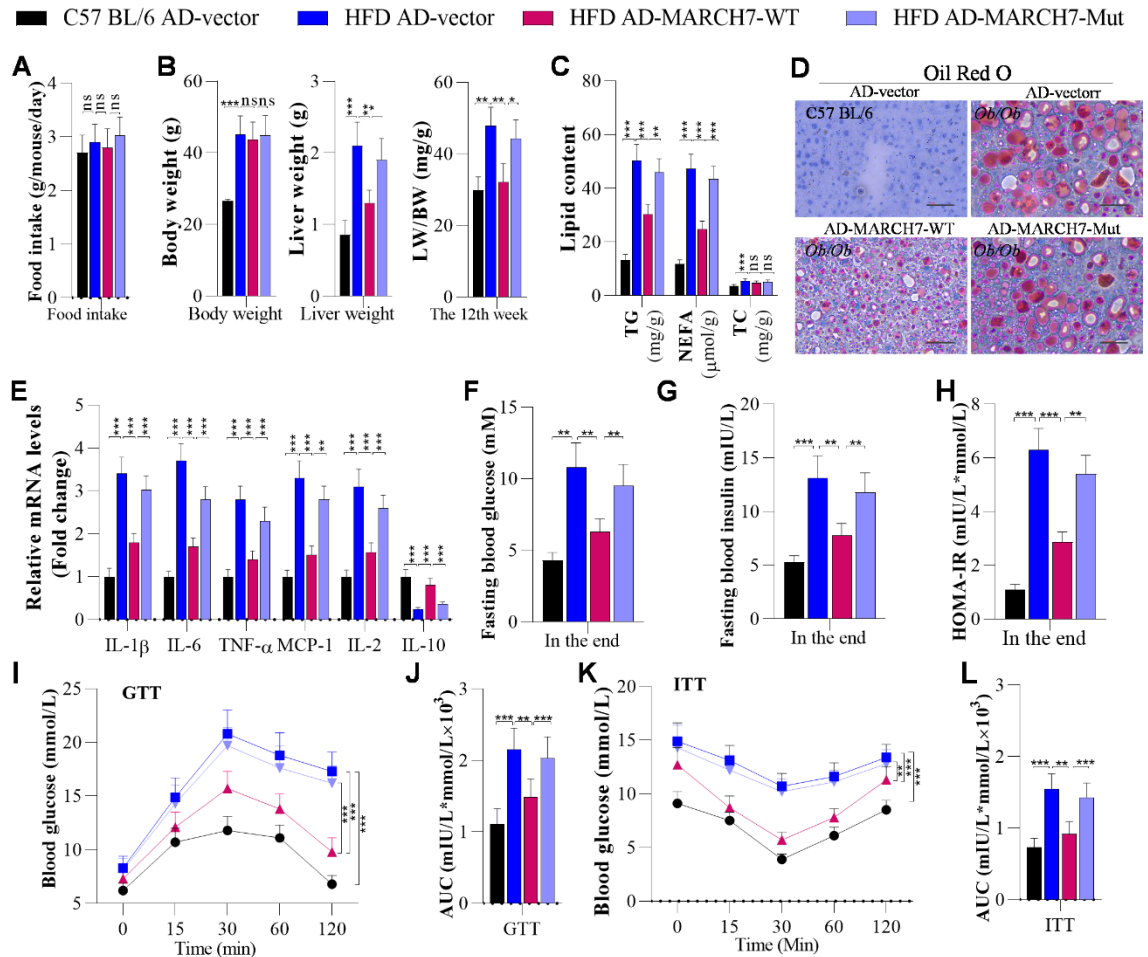

169  
 170  
 171  
 172  
 173  
 174  
 175  
 176  
 177  
 178  
 179  
 180  
 181  
 182  
 183  
 184

**Fig. S11. The MARCH7 mutant fails to suppress hepatic steatosis, inflammation, and insulin resistance in HFD-fed mice.** Mice were fed a ND or HFD for 12 weeks. Then, they were injected every 10 days with the adenoviruses AD-vector, AD-MARCH7-WT, and AD-MARCH7-Mut, and these mice were continuously fed a ND or HFD. After 3 weeks of the first injection, the mice were used for analysis. (A) The food intake of ND- and HFD-mice (n=5/group). (B) The body weights, liver weights, and LW/BW ratios of C57BL/6 and HFD-fed mice (n=5/group). (C) Hepatic TG, NEFA, and TC levels were measured using ELISA (n=5/group). (D) Oil Red O staining of mouse liver sections (n=5/group); Scale bar, 50  $\mu$ M. (E) The mRNA levels of inflammation-related genes analysed by RT-qPCR (n=5/group). (F) Fasting blood glucose levels of C57BL/6 and HFD-fed mice (n=5/group). (G, H) Fasting insulin levels and HOMA-IR scores of C57BL/6 and HFD-fed mice (n=5/group). (I-L) GTT and ITT of C57BL/6 and HFD-fed mice and the areas under the curve (AUCs) for the GTT and ITT (N=5/group). The data are presented as the mean  $\pm$  S.D. of three independent experiments. A *p* value of < 0.05 was considered statistically significant; and \**p*<0.05, \*\**p*<0.01, \*\*\**p*<0.001 assessed via a ANOVA with the Bonferroni post hoc test for comparisons among more than two groups (A-L); ns: not significant.

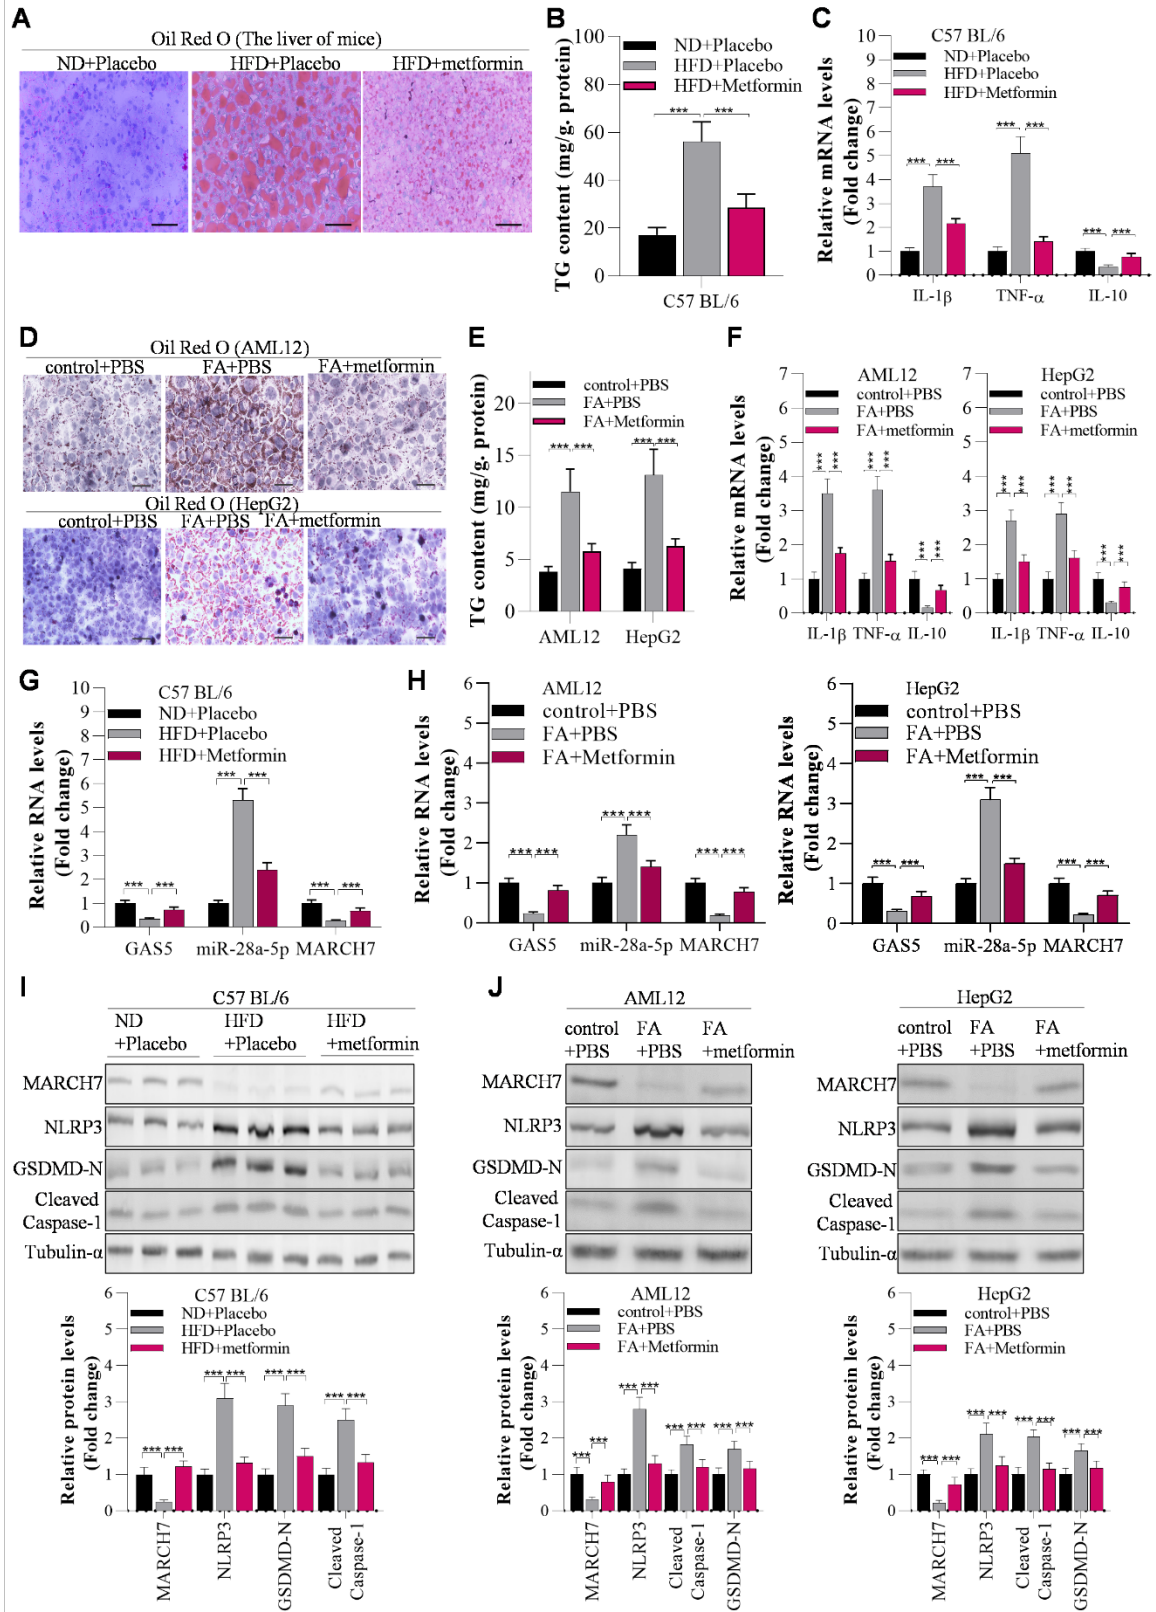

185

186

Fig. S12. Metformin exerts anti-NAFLD activity by affecting the levels of GAS5, miR-28a-5p,

187 **MARCH7, and NLRP3.** C57BL/6 mice (N=5) were administered daily with 200 mg metformin per  
188 kilogram of body weight for a month accompanied by 12 weeks of ND or HFD feeding. AML12 and HepG2  
189 cells were incubated with FAs for 6 h, and they were incubated with both 10 nM metformin and FA for  
190 another 6 h. (A) Oil Red O staining of mouse liver sections; Scale bar, 50  $\mu$ M. (B) The TG content was  
191 measured using ELISA in the livers of 12-week-old ND- or HFD-fed C57BL/6 mice (n=8/group). (C) RT-  
192 qPCR analysis of inflammatory factors in the livers of mice. (D) Oil Red O staining of hepatocytes (AML12  
193 and HepG2); Scale bar, 50  $\mu$ M. (E) The TG content was measured using ELISA in hepatocytes. (F) RT-  
194 qPCR analysis of inflammatory genes in hepatocytes. (G) RT-qPCR analysis of the expression of miR-28a-  
195 5p, MARCH7, and GAS5 in the livers of mice. (H) RT-qPCR analysis of the expression of miR-28a-5p,  
196 MARCH7, and GAS5 in hepatocytes. (I) Western blot analysis of MARCH7-mediated pyroptosis genes in  
197 the livers of mice. (J) Western blot analysis of MARCH7-mediated pyroptosis genes in hepatocytes. The  
198 data are presented as the mean  $\pm$  S.D. of three independent experiments. The one-way analysis of variance  
199 (ANOVA) with the Bonferroni post hoc test was conducted for comparisons among more than two groups  
200 (B, C, E-J). A *p* value of  $< 0.05$  was considered statistically significant; and \**p*  $< 0.05$ , \*\**p*  $< 0.01$ , \*\*\**p*  $< 0.001$ ;  
201 <sup>ns</sup>*p*  $> 0.05$ , ns: not significant.  
202

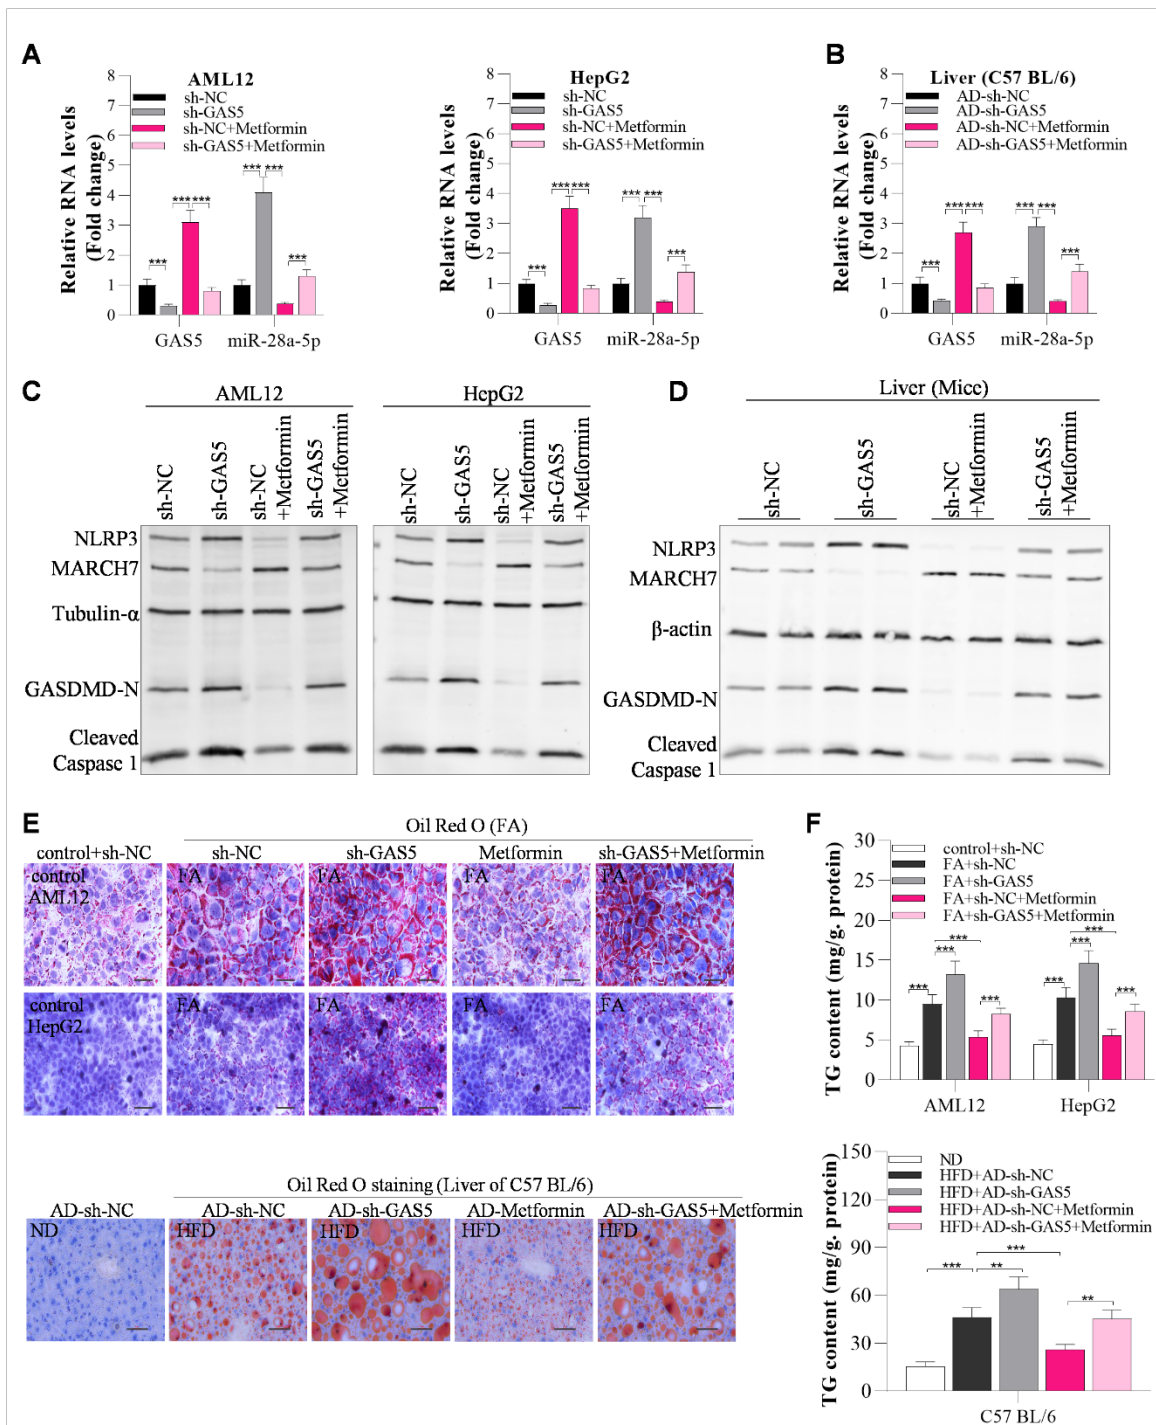

203

204

205

206

207

208

209

**Fig. S13. Knockdown of GAS5 significantly inhibited the effects of metformin on pyroptosis and hepatic lipid deposition.** After 48 h of transfection, AML12 and HepG2 cells were incubated with 10 nM metformin for another 6 h. After one week of injection of AD-GAS5, C57BL/6 mice were administered 200 mg metformin per kilogram of body weight daily for one month. Then, AML12 cells, HepG2 cells, and mouse livers were collected for further experiments. (A, B) RT-qPCR was used to determine the effects of metformin on miR-28a-5p levels in GAS5-knockdown AML12 cells, HepG2 cells, and mouse livers. (C, D)

210 Western blot analysis of the effects of metformin on pyroptosis in GAS5-knockdown AML12 cells, HepG2  
211 cells, and mouse livers. (E, F) Oil Red O staining was used to examine the effects of metformin on lipid  
212 accumulation in GAS5-knockdown AML12 cells, HepG2 cells, and mouse livers; Scale bar, 50  $\mu$ M. The data  
213 are presented as the mean  $\pm$  S.D. of three independent experiments. The one-way analysis of variance  
214 (ANOVA) with the Bonferroni post hoc test was conducted for comparisons among more than two groups  
215 (A, B, F). A  $p$  value of  $< 0.05$  was considered statistically significant; and \* $p < 0.05$ , \*\* $p < 0.01$ , \*\*\* $p < 0.001$ ;  
216 <sup>ns</sup> $p > 0.05$ , ns: not significant.  
217
